# Supplementary material
Source: PubMed Central journal article supplement (PMC8830148)
Supplement: mmc1.pdf [file mmc1.pdf]

# UNITED STATES - Changes in Food Behavior due to COVID-19

This questionnaire aims to assess current consumption and acquisition of food during the COVID-19 pandemic.

The pandemic we are facing affects daily habits. In order to understand eating behavior during an unexpected situation, such as the COVID-19 pandemic, we developed this questionnaire.

We would like to thank you for your participation.

This study is being coordinated by Portuguese Universities (University of Évora, the Higher School of Hospitality and Tourism of Estoril and the Faculty of Nutrition and Food Sciences of the University of Porto) and is being carried out in different countries.

The current version is intended for United States residents 18 years of age or older. Please respond to each of the questions, reporting your behavior during this period and how it differs from the period prior to the pandemic.

The questionnaire is anonymous, voluntary and confidential. Data is used for research purposes only and elements that identify participants are not collected. You can stop participating at any time without having to justify it. If you have a question, please contact us by email at [ecsl@uevora.pt](mailto:ecsl@uevora.pt)

There are 22 questions in this survey

## Consent

**[ ] I am at least 18 years old, reside in the United States of America, and agree to participate in this study? \***

Please choose **only one** of the following:

- Yes
- No

## Group I - Sociodemographic and actual situation

### [ ]Age \*

Please write your answer here:

### [ ]Sex \*

Please choose **only one** of the following:

- Female  
 Male

### [ ]School level \*

Please choose **only one** of the following:

- Less than high school  
 High school graduate (or equivalent)  
 Some college education (1-4 years, no degree)  
 Associate's degree (including occupational or academic degrees)  
 Bachelor's degree (BA, BS, AB, etc.)  
 Graduate degree (Master's degree, professional degree such as MD or JD, or doctorate)  
 Other

### [ ]

#### Number of individuals living in household including yourself.

\*

Please choose **only one** of the following:

- 1  
 2  
 3  
 4  
 More than 4

**[ ]Do you have children under the age of 12 living with you? \***Please choose **only one** of the following:

- No
- Yes - 1 child
- Yes - 2 children
- Yes - 3 or more children

**[ ]Do you have people over the age of 65 living with you? \***Please choose **only one** of the following:

- No
- Yes - 1
- Yes - 2 or more

**[ ]Monthly income (total of household) \***Please choose **only one** of the following:

- Less than \$10,000
- \$10,000 to \$14,999
- \$15,000 to \$24,999
- \$25,000 to \$34,999
- \$35,000 to \$49,999
- \$50,000 to \$74,999
- \$75,000 to \$99,999
- \$100,000 to \$149,999
- \$150,000 or more
- Don't know/ don't answer
- Other

**[ ]Percentage of income (monthly) allocated to food (in the pandemic period) \***Please choose **only one** of the following:

- Less than 10%
- 10% -25%
- 25% -50%
- 50% -75%
- More than 75%

[]

**Employment status \***Please choose **only one** of the following:

- Self-employed
- Employee (part-time)
- Employee (full-time)
- Retired
- Student
- Student (also employed)
- Unemployed
- Unemployed due to COVID-19
- Other

**[]To what extent are you staying at home due to COVID-19? \***Please choose **only one** of the following:

- I stay at home all the time.
- I stay at home most of the time, except for occasional trips (e.g., food shopping, support to family members)
- I leave my home regularly (e.g., still going in to work as an essential employee)
- Other

[]

**Please tell the number of rooms in your residence and whether it includes outdoor space. (please do not consider bathrooms or garage s room and consider outdoor space only when it allows to wakt or play outside). \***

Please write your answer here:

[]

**Before the pandemic, did you practice physical activity? (e.g., going walking, running, or biking; taking a hike in the woods; taking a fitness class at the gym; playing a sport; doing yoga)? \***

Please choose **only one** of the following:

- Yes  
 No

[]**How often? \***

Please choose **only one** of the following:

- I didn't practice physical activity  
 1-2 times a week (45-60 min each session)  
 1-2 times a week (over 60 min each session)  
 3-4 times a week (45-60 min each session)  
 3-4 times a week (over 60 min each session)  
 more than 5 times a week (45-60 min each session)  
 more than 5 times a week (over 60 min each session)

[]**Weight (pounds) \***

Please write your answer here:

[]**Height (inches) (e.g. 5.8 inches) \***

Please write your answer here:

[]

**Residence \***

Please choose **only one** of the following:

- Urban  
 Suburban  
 Rural

## Group II - Eating motivation

Read the following statements and indicate the extent to which each one contributes to your current food choices during COVID-19. Additionally, indicate whether each response applies less, more, or about the same compared to your life prior to COVID-19, using the columns on the right.

### [ ] In this phase of the COVID-19 pandemic, I choose the foods I will eat... \*

Please choose the appropriate response for each item:

|                                                                                         | 1 –<br>Never          | 2                     | 3                     | 4                     | 5                     | 6                     | 7 –<br>Always         | Less<br>than in<br>the<br>period<br>before<br>COVID-<br>19 | Equal<br>to the<br>period<br>before<br>COVID-<br>19 | More<br>than in<br>the<br>period<br>before<br>COVID-<br>19 |
|-----------------------------------------------------------------------------------------|-----------------------|-----------------------|-----------------------|-----------------------|-----------------------|-----------------------|-----------------------|------------------------------------------------------------|-----------------------------------------------------|------------------------------------------------------------|
| ... because I have an appetite for it                                                   | <input type="radio"/>                                      | <input type="radio"/>                               | <input type="radio"/>                                      |
| ...because it tastes good                                                               | <input type="radio"/>                                      | <input type="radio"/>                               | <input type="radio"/>                                      |
| ... because I like it                                                                   | <input type="radio"/>                                      | <input type="radio"/>                               | <input type="radio"/>                                      |
| ... because I am accustomed to eating it                                                | <input type="radio"/>                                      | <input type="radio"/>                               | <input type="radio"/>                                      |
| ... because I usually eat it                                                            | <input type="radio"/>                                      | <input type="radio"/>                               | <input type="radio"/>                                      |
| ... because I am familiar with it                                                       | <input type="radio"/>                                      | <input type="radio"/>                               | <input type="radio"/>                                      |
| ... because I need energy                                                               | <input type="radio"/>                                      | <input type="radio"/>                               | <input type="radio"/>                                      |
| ... because it is pleasantly filling                                                    | <input type="radio"/>                                      | <input type="radio"/>                               | <input type="radio"/>                                      |
| ... because I'm hungry                                                                  | <input type="radio"/>                                      | <input type="radio"/>                               | <input type="radio"/>                                      |
| ... to maintain a balanced diet                                                         | <input type="radio"/>                                      | <input type="radio"/>                               | <input type="radio"/>                                      |
| ... because it is healthy                                                               | <input type="radio"/>                                      | <input type="radio"/>                               | <input type="radio"/>                                      |
| ... because it keeps me in shape                                                        | <input type="radio"/>                                      | <input type="radio"/>                               | <input type="radio"/>                                      |
| ... because it's quick to prepare                                                       | <input type="radio"/>                                      | <input type="radio"/>                               | <input type="radio"/>                                      |
| ... because it is the most convenient                                                   | <input type="radio"/>                                      | <input type="radio"/>                               | <input type="radio"/>                                      |
| ... because it is easy to prepare                                                       | <input type="radio"/>                                      | <input type="radio"/>                               | <input type="radio"/>                                      |
| ... because I enjoy it                                                                  | <input type="radio"/>                                      | <input type="radio"/>                               | <input type="radio"/>                                      |
| ... in order to indulge myself                                                          | <input type="radio"/>                                      | <input type="radio"/>                               | <input type="radio"/>                                      |
| ... in order to reward myself                                                           | <input type="radio"/>                                      | <input type="radio"/>                               | <input type="radio"/>                                      |
| ... because it is natural (eg, it is not genetically modified)                          | <input type="radio"/>                                      | <input type="radio"/>                               | <input type="radio"/>                                      |
| ... because it contains no harmful substances (eg, pesticides, pollutants, antibiotics) | <input type="radio"/>                                      | <input type="radio"/>                               | <input type="radio"/>                                      |
| ... because it's organic                                                                | <input type="radio"/>                                      | <input type="radio"/>                               | <input type="radio"/>                                      |
| ...because it is inexpensive                                                            | <input type="radio"/>                                      | <input type="radio"/>                               | <input type="radio"/>                                      |
| ... because I don't want to spend more money                                            | <input type="radio"/>                                      | <input type="radio"/>                               | <input type="radio"/>                                      |
| ... because it is on sale                                                               | <input type="radio"/>                                      | <input type="radio"/>                               | <input type="radio"/>                                      |
| ... because it is low in calories                                                       | <input type="radio"/>                                      | <input type="radio"/>                               | <input type="radio"/>                                      |
| ... because I watch my weight                                                           | <input type="radio"/>                                      | <input type="radio"/>                               | <input type="radio"/>                                      |
| ... because it is low in fat                                                            | <input type="radio"/>                                      | <input type="radio"/>                               | <input type="radio"/>                                      |
| ... because I feel sad                                                                  | <input type="radio"/>                                      | <input type="radio"/>                               | <input type="radio"/>                                      |
| ... because I feel frustrated                                                           | <input type="radio"/>                                      | <input type="radio"/>                               | <input type="radio"/>                                      |
| ... because I feel alone                                                                | <input type="radio"/>                                      | <input type="radio"/>                               | <input type="radio"/>                                      |

### Group III - Food consumption (Food Frequency intake)

[ ]

**Currently (during the COVID-19 pandemic), how often do you consume food from each of the groups indicated? Additionally, indicate whether you are now consuming each food less, more than, or about the same as you did before the pandemic, using the columns on the right. \***

Please choose the appropriate response for each item:

|                                                                  | Never<br>or <1<br>time<br>per<br>month | 2-3<br>times<br>per<br>month | 1<br>time<br>per<br>week | 2-3<br>times<br>per<br>week | 4-6<br>times<br>per<br>week | 1<br>time<br>per<br>day | 2-3<br>times<br>per<br>day | >3<br>times<br>per<br>day | Less<br>than in<br>the<br>period<br>before<br>COVID-<br>19 | Equal<br>to the<br>period<br>before<br>COVID-<br>19 | More<br>than in<br>the<br>period<br>before<br>COVID-<br>19 |
|------------------------------------------------------------------|----------------------------------------|------------------------------|--------------------------|-----------------------------|-----------------------------|-------------------------|----------------------------|---------------------------|------------------------------------------------------------|-----------------------------------------------------|------------------------------------------------------------|
| Dairy products (milk, yogurts, cheese)                           | <input type="radio"/>                  | <input type="radio"/>        | <input type="radio"/>    | <input type="radio"/>       | <input type="radio"/>       | <input type="radio"/>   | <input type="radio"/>      | <input type="radio"/>     | <input type="radio"/>                                      | <input type="radio"/>                               | <input type="radio"/>                                      |
| Ice cream and frozen deserts                                     | <input type="radio"/>                  | <input type="radio"/>        | <input type="radio"/>    | <input type="radio"/>       | <input type="radio"/>       | <input type="radio"/>   | <input type="radio"/>      | <input type="radio"/>     | <input type="radio"/>                                      | <input type="radio"/>                               | <input type="radio"/>                                      |
| Red meat (beef, pork)                                            | <input type="radio"/>                  | <input type="radio"/>        | <input type="radio"/>    | <input type="radio"/>       | <input type="radio"/>       | <input type="radio"/>   | <input type="radio"/>      | <input type="radio"/>     | <input type="radio"/>                                      | <input type="radio"/>                               | <input type="radio"/>                                      |
| White meat (chicken, turkey)                                     | <input type="radio"/>                  | <input type="radio"/>        | <input type="radio"/>    | <input type="radio"/>       | <input type="radio"/>       | <input type="radio"/>   | <input type="radio"/>      | <input type="radio"/>     | <input type="radio"/>                                      | <input type="radio"/>                               | <input type="radio"/>                                      |
| Fish (fish, shellfish, ...)                                      | <input type="radio"/>                  | <input type="radio"/>        | <input type="radio"/>    | <input type="radio"/>       | <input type="radio"/>       | <input type="radio"/>   | <input type="radio"/>      | <input type="radio"/>     | <input type="radio"/>                                      | <input type="radio"/>                               | <input type="radio"/>                                      |
| Processed foods / fast food (sausages, pizza, hamburger, etc.)   | <input type="radio"/>                  | <input type="radio"/>        | <input type="radio"/>    | <input type="radio"/>       | <input type="radio"/>       | <input type="radio"/>   | <input type="radio"/>      | <input type="radio"/>     | <input type="radio"/>                                      | <input type="radio"/>                               | <input type="radio"/>                                      |
| Eggs and egg substitutes                                         | <input type="radio"/>                  | <input type="radio"/>        | <input type="radio"/>    | <input type="radio"/>       | <input type="radio"/>       | <input type="radio"/>   | <input type="radio"/>      | <input type="radio"/>     | <input type="radio"/>                                      | <input type="radio"/>                               | <input type="radio"/>                                      |
| Vegetables (cabbage, carrots, broccoli, etc.)                    | <input type="radio"/>                  | <input type="radio"/>        | <input type="radio"/>    | <input type="radio"/>       | <input type="radio"/>       | <input type="radio"/>   | <input type="radio"/>      | <input type="radio"/>     | <input type="radio"/>                                      | <input type="radio"/>                               | <input type="radio"/>                                      |
| Potatoes                                                         | <input type="radio"/>                  | <input type="radio"/>        | <input type="radio"/>    | <input type="radio"/>       | <input type="radio"/>       | <input type="radio"/>   | <input type="radio"/>      | <input type="radio"/>     | <input type="radio"/>                                      | <input type="radio"/>                               | <input type="radio"/>                                      |
| Cereals (rice, pasta, ...)                                       | <input type="radio"/>                  | <input type="radio"/>        | <input type="radio"/>    | <input type="radio"/>       | <input type="radio"/>       | <input type="radio"/>   | <input type="radio"/>      | <input type="radio"/>     | <input type="radio"/>                                      | <input type="radio"/>                               | <input type="radio"/>                                      |
| Bread                                                            | <input type="radio"/>                  | <input type="radio"/>        | <input type="radio"/>    | <input type="radio"/>       | <input type="radio"/>       | <input type="radio"/>   | <input type="radio"/>      | <input type="radio"/>     | <input type="radio"/>                                      | <input type="radio"/>                               | <input type="radio"/>                                      |
| Breakfast cereal (cold cereal, oatmeal, cooked breakfast cereal) | <input type="radio"/>                  | <input type="radio"/>        | <input type="radio"/>    | <input type="radio"/>       | <input type="radio"/>       | <input type="radio"/>   | <input type="radio"/>      | <input type="radio"/>     | <input type="radio"/>                                      | <input type="radio"/>                               | <input type="radio"/>                                      |
| Fresh fruits (apples, oranges, bananas, strawberries,            | <input type="radio"/>                  | <input type="radio"/>        | <input type="radio"/>    | <input type="radio"/>       | <input type="radio"/>       | <input type="radio"/>   | <input type="radio"/>      | <input type="radio"/>     | <input type="radio"/>                                      | <input type="radio"/>                               | <input type="radio"/>                                      |

|                                                               |                       |                       |                       |                       |                       |                       |                       |                       |                       |                       |                       |
|---------------------------------------------------------------|-----------------------|-----------------------|-----------------------|-----------------------|-----------------------|-----------------------|-----------------------|-----------------------|-----------------------|-----------------------|-----------------------|
| etc.)                                                         |                       |                       |                       |                       |                       |                       |                       |                       |                       |                       |                       |
| Butter or Margarine                                           | <input type="radio"/> |
| Olive oil                                                     | <input type="radio"/> |
| Beans and Legumes (beans, lentils, etc.)                      | <input type="radio"/> |
| Nuts (almonds, peanuts, etc., no salt)                        | <input type="radio"/> |
| Cakes and Cookies (cake, cookies, brownies, pie, doughnuts)   | <input type="radio"/> |
| Chocolates                                                    | <input type="radio"/> |
| Other sweet snacks (eg cereal bars,...)                       | <input type="radio"/> |
| Salty snacks (chips, pretzels, crackers, salted nuts etc ...) | <input type="radio"/> |
| Wine                                                          | <input type="radio"/> |
| Beer                                                          | <input type="radio"/> |
| Spirits                                                       | <input type="radio"/> |
| Black coffee or tea                                           | <input type="radio"/> |



### Group IV

Perception about differences in the acquisition, preparation, consumption and waste management

**[ ] Indicate how much you do each of the following currently (during the COVID-19 pandemic). In the columns on the right, indicate how this differs from before the pandemic. \***

Please choose the appropriate response for each item:

|                                                                                   | 1 –<br>Never          | 2                     | 3                     | 4                     | 5                     | 6                     | 7 –<br>Always         | Less<br>than in<br>the<br>period<br>before<br>COVID-<br>19 | Equal<br>to the<br>period<br>before<br>COVID-<br>19 | More<br>than in<br>the<br>period<br>before<br>COVID-<br>19 |
|-----------------------------------------------------------------------------------|-----------------------|-----------------------|-----------------------|-----------------------|-----------------------|-----------------------|-----------------------|------------------------------------------------------------|-----------------------------------------------------|------------------------------------------------------------|
| To buy your food from grocery stores or markets near your home                    | <input type="radio"/>                                      | <input type="radio"/>                               | <input type="radio"/>                                      |
| To buy food from large superstores or supermarkets (e.g., Walmart)                | <input type="radio"/>                                      | <input type="radio"/>                               | <input type="radio"/>                                      |
| To buy food from apps and / or online stores.                                     | <input type="radio"/>                                      | <input type="radio"/>                               | <input type="radio"/>                                      |
| To buy food in large quantities (for periods of longer than 1 week)               | <input type="radio"/>                                      | <input type="radio"/>                               | <input type="radio"/>                                      |
| To purchase products from organic farming.                                        | <input type="radio"/>                                      | <input type="radio"/>                               | <input type="radio"/>                                      |
| To acquire locally produced foods.                                                | <input type="radio"/>                                      | <input type="radio"/>                               | <input type="radio"/>                                      |
| To grow or produce your own foods (e.g., vegetable garden, making bread)          | <input type="radio"/>                                      | <input type="radio"/>                               | <input type="radio"/>                                      |
| To dedicate time to preparing Meals                                               | <input type="radio"/>                                      | <input type="radio"/>                               | <input type="radio"/>                                      |
| To consume meals prepared outside home (eg, takeout or delivery from restaurants) | <input type="radio"/>                                      | <input type="radio"/>                               | <input type="radio"/>                                      |
| To feel appetite / desire to eat.                                                 | <input type="radio"/>                                      | <input type="radio"/>                               | <input type="radio"/>                                      |
| To maintain control over the type of food and the amount eaten                    | <input type="radio"/>                                      | <input type="radio"/>                               | <input type="radio"/>                                      |
| To maintain a varied / balanced diet                                              | <input type="radio"/>                                      | <input type="radio"/>                               | <input type="radio"/>                                      |
| To look for foods that provide the sensation of comfort                           | <input type="radio"/>                                      | <input type="radio"/>                               | <input type="radio"/>                                      |
| To eat meals at fixed / predictable times                                         | <input type="radio"/>                                      | <input type="radio"/>                               | <input type="radio"/>                                      |
| To snack between meals                                                            | <input type="radio"/>                                      | <input type="radio"/>                               | <input type="radio"/>                                      |
| To make new dishes or try new recipes                                             | <input type="radio"/>                                      | <input type="radio"/>                               | <input type="radio"/>                                      |
| To try not to waste food                                                          | <input type="radio"/>                                      | <input type="radio"/>                               | <input type="radio"/>                                      |
| To plan ahead for shopping and meals                                              | <input type="radio"/>                                      | <input type="radio"/>                               | <input type="radio"/>                                      |
| To be aware of products' expiration dates/ shelf life                             | <input type="radio"/>                                      | <input type="radio"/>                               | <input type="radio"/>                                      |

**[ ]Taking into account the current pandemic context, indicate to what extent you prioritize the purchase of each of the following food groups. In the columns on the right, indicate how this differs from the period before the pandemic. \***

Please choose the appropriate response for each item:

|                                                                  | 1 –<br>Never          | 2                     | 3                     | 4                     | 5                     | 6                     | 7 -<br>Always         | Less than<br>in the<br>period<br>before<br>COVID-<br>19 | Equal to<br>the<br>period<br>before<br>COVID-<br>19 | More<br>than in<br>the<br>period<br>before<br>COVID-<br>19 |
|------------------------------------------------------------------|-----------------------|-----------------------|-----------------------|-----------------------|-----------------------|-----------------------|-----------------------|---------------------------------------------------------|-----------------------------------------------------|------------------------------------------------------------|
| Fresh meat and fish                                              | <input type="radio"/>                                   | <input type="radio"/>                               | <input type="radio"/>                                      |
| Frozen meat and fish                                             | <input type="radio"/>                                   | <input type="radio"/>                               | <input type="radio"/>                                      |
| Canned fish (eg tuna)                                            | <input type="radio"/>                                   | <input type="radio"/>                               | <input type="radio"/>                                      |
| Dairy products (eg cheese, yogurt)                               | <input type="radio"/>                                   | <input type="radio"/>                               | <input type="radio"/>                                      |
| Ice cream and frozen deserts                                     | <input type="radio"/>                                   | <input type="radio"/>                               | <input type="radio"/>                                      |
| Fresh fruit (eg banana, Apple)                                   | <input type="radio"/>                                   | <input type="radio"/>                               | <input type="radio"/>                                      |
| Fresh vegetables (eg cabbage, carrots)                           | <input type="radio"/>                                   | <input type="radio"/>                               | <input type="radio"/>                                      |
| Frozen vegetables (e.g. spinach, broccoli)                       | <input type="radio"/>                                   | <input type="radio"/>                               | <input type="radio"/>                                      |
| Dried beans and legumes (eg grain, beans, lentils)               | <input type="radio"/>                                   | <input type="radio"/>                               | <input type="radio"/>                                      |
| Canned beans and legumes (ex. grain, beans, lentils)             | <input type="radio"/>                                   | <input type="radio"/>                               | <input type="radio"/>                                      |
| Nuts (almonds, peanuts, etc., no salt)                           | <input type="radio"/>                                   | <input type="radio"/>                               | <input type="radio"/>                                      |
| Salty snacks (chips, pretzels, crackers, salted nuts etc ...)    | <input type="radio"/>                                   | <input type="radio"/>                               | <input type="radio"/>                                      |
| Sweet snacks (eg candy bars) cereals; cakes and cookies; sweets) | <input type="radio"/>                                   | <input type="radio"/>                               | <input type="radio"/>                                      |
| Chocolates                                                       | <input type="radio"/>                                   | <input type="radio"/>                               | <input type="radio"/>                                      |
| Sugar                                                            | <input type="radio"/>                                   | <input type="radio"/>                               | <input type="radio"/>                                      |
| Bread                                                            | <input type="radio"/>                                   | <input type="radio"/>                               | <input type="radio"/>                                      |
| Cereals (pasta, rice) and potatoes                               | <input type="radio"/>                                   | <input type="radio"/>                               | <input type="radio"/>                                      |
| Eggs                                                             | <input type="radio"/>                                   | <input type="radio"/>                               | <input type="radio"/>                                      |
| Pre-cooked meals                                                 | <input type="radio"/>                                   | <input type="radio"/>                               | <input type="radio"/>                                      |
| Alcoholic beverages                                              | <input type="radio"/>                                   | <input type="radio"/>                               | <input type="radio"/>                                      |
| Black coffee or tea                                              | <input type="radio"/>                                   | <input type="radio"/>                               | <input type="radio"/>                                      |

[]

**Before the pandemic, how often did you consume your main meals in the following locations: \***

Please choose the appropriate response for each item:

|                                                    | Never or<br>less than<br>1 time<br>per<br>month | 2-3 times<br>per<br>month | 1 time<br>per week    | 2-3 times<br>per week | 4-6 times<br>per week | 1 time<br>per day     | 2 times<br>per day    |
|----------------------------------------------------|-------------------------------------------------|---------------------------|-----------------------|-----------------------|-----------------------|-----------------------|-----------------------|
| Meal in sit-down restaurant                        | <input type="radio"/>                           | <input type="radio"/>     | <input type="radio"/> | <input type="radio"/> | <input type="radio"/> | <input type="radio"/> | <input type="radio"/> |
| Meal in fast-food restaurant                       | <input type="radio"/>                           | <input type="radio"/>     | <input type="radio"/> | <input type="radio"/> | <input type="radio"/> | <input type="radio"/> | <input type="radio"/> |
| Meal in snack bar/coffee<br>shop (e.g., Starbucks) | <input type="radio"/>                           | <input type="radio"/>     | <input type="radio"/> | <input type="radio"/> | <input type="radio"/> | <input type="radio"/> | <input type="radio"/> |
| Food court / cafeteria                             | <input type="radio"/>                           | <input type="radio"/>     | <input type="radio"/> | <input type="radio"/> | <input type="radio"/> | <input type="radio"/> | <input type="radio"/> |
| Takeout or delivery meal                           | <input type="radio"/>                           | <input type="radio"/>     | <input type="radio"/> | <input type="radio"/> | <input type="radio"/> | <input type="radio"/> | <input type="radio"/> |
| Meal cooked at home                                | <input type="radio"/>                           | <input type="radio"/>     | <input type="radio"/> | <input type="radio"/> | <input type="radio"/> | <input type="radio"/> | <input type="radio"/> |

**Many Thanks!**  
07/09/2020 – 16:52

Submit your survey.  
Thank you for completing this survey.
